# Supplementary material
Source: MDPI journal article supplement (https://www.mdpi.com/2073-4433/11/1/48)
Supplement: s1 [file s1]

Supplementary data

# Long-Range Transport Influence on Key Chemical Components of PM<sub>2.5</sub> in the Seoul Metropolitan Area, South Korea, during the Years 2012–2016

Changhan Bae <sup>1</sup>, Byeong-Uk Kim <sup>2</sup>, Hyun Cheol Kim <sup>3,4</sup>, Chul Yoo <sup>5</sup> and Soontae Kim <sup>1,\*</sup>

**Table S1.** Statistics of CMAQ model performance evaluation for daily mean PM<sub>2.5</sub> concentration and chemical composition at the SMA super site for the period of 2012–2016.

|                                         |          | PM <sub>2.5</sub> | Sulfate | Nitrate | Ammonium | EC    | OC    |
|-----------------------------------------|----------|-------------------|---------|---------|----------|-------|-------|
| Number of data                          |          | 1721              | 1269    | 1267    | 1270     | 1305  | 1305  |
| Observed mean concentration (µg/m³)     |          | 31.7              | 6.4     | 6.3     | 4.1      | 1.5   | 3.6   |
| Simulated mean concentration (µg/m³)    |          | 28.1              | 4.6     | 8.4     | 4.3      | 1.8   | 3.3   |
| Correlation Coefficient (R)             |          | 0.72              | 0.61    | 0.59    | 0.66     | 0.60  | 0.61  |
| Normalized mean bias (NMB)              |          | -11%              | -28%    | 33%     | 5%       | 21%   | -8%   |
| Normalized mean error (NME)             |          | 30%               | 48%     | 68%     | 44%      | 41%   | 33%   |
| Root mean square error (µg/m³)          |          | 14.1              | 5.83    | 7.0     | 2.6      | 0.8   | 1.2   |
| Index of agreement                      |          | 0.82              | 0.67    | 0.74    | 0.79     | 0.74  | 0.77  |
| Goals and Criteria (Emery et al., 2017) |          |                   |         |         |          |       |       |
| R                                       | Goal     | >0.70             | >0.70   | -       | >0.70    | -     | -     |
|                                         | Criteria | >0.40             | >0.40   | -       | >0.40    | -     | -     |
| NMB                                     | Goal     | <±10%             | <±10%   | <±15%   | <±10%    | <±20% | <±15% |
|                                         | Criteria | <±30%             | <±30%   | <±65%   | <±30%    | <±40% | <±50% |
| NME                                     | Goal     | <35%              | <35%    | <65%    | <35%     | <60%  | <45%  |
|                                         | Criteria | <50%              | <50%    | <115%   | <50%     | <75%  | <65%  |

**Table S2.** Statistics of WRF model performance evaluation for 1-hr average temperature and wind speed over Northeast Asia in modeling domain for the period of 2012–2016.

|                                             | 2-m Temperature | 10-m Wind Speed |
|---------------------------------------------|-----------------|-----------------|
| Number of Data                              | 43817           | 43817           |
| Observed Mean                               | 14.8 °C         | 3.2 m/s         |
| Simulated Mean                              | 14.4 °C         | 4.0 m/s         |
| Correlation Coefficient (R)                 | 0.99            | 0.8             |
| Root Mean Square Error (RMSE)               | 1.3 °C          | 1.0 m/s         |
| Bias                                        | -0.4 °C         | 0.8 m/s         |
| Index of Agreement (IOA)                    | 0.99            | 0.79            |
| Statistical Benchmarks (Emery et al., 2001) |                 |                 |
| RMSE                                        | -               | < 2.0 m/s       |
| Bias                                        | < ±0.5 °C       | < ±0.5 m/s      |
| IOA                                         | > 0.8           | > 0.6           |

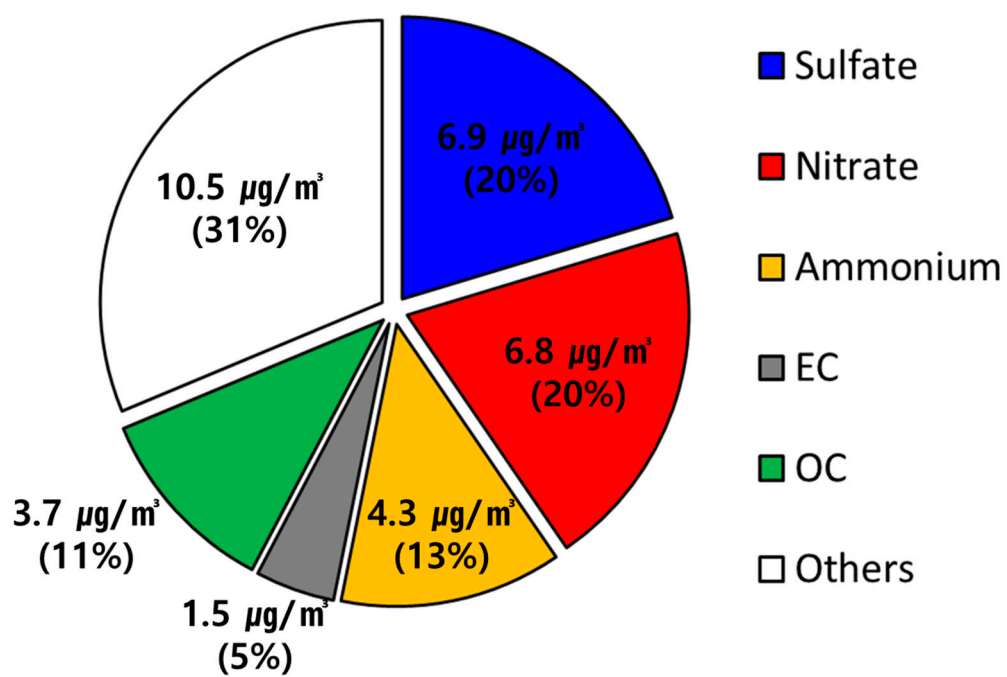

**Figure S1.** PM<sub>2.5</sub> chemical composition observed at the SMA super site for the period of 2012–2016.

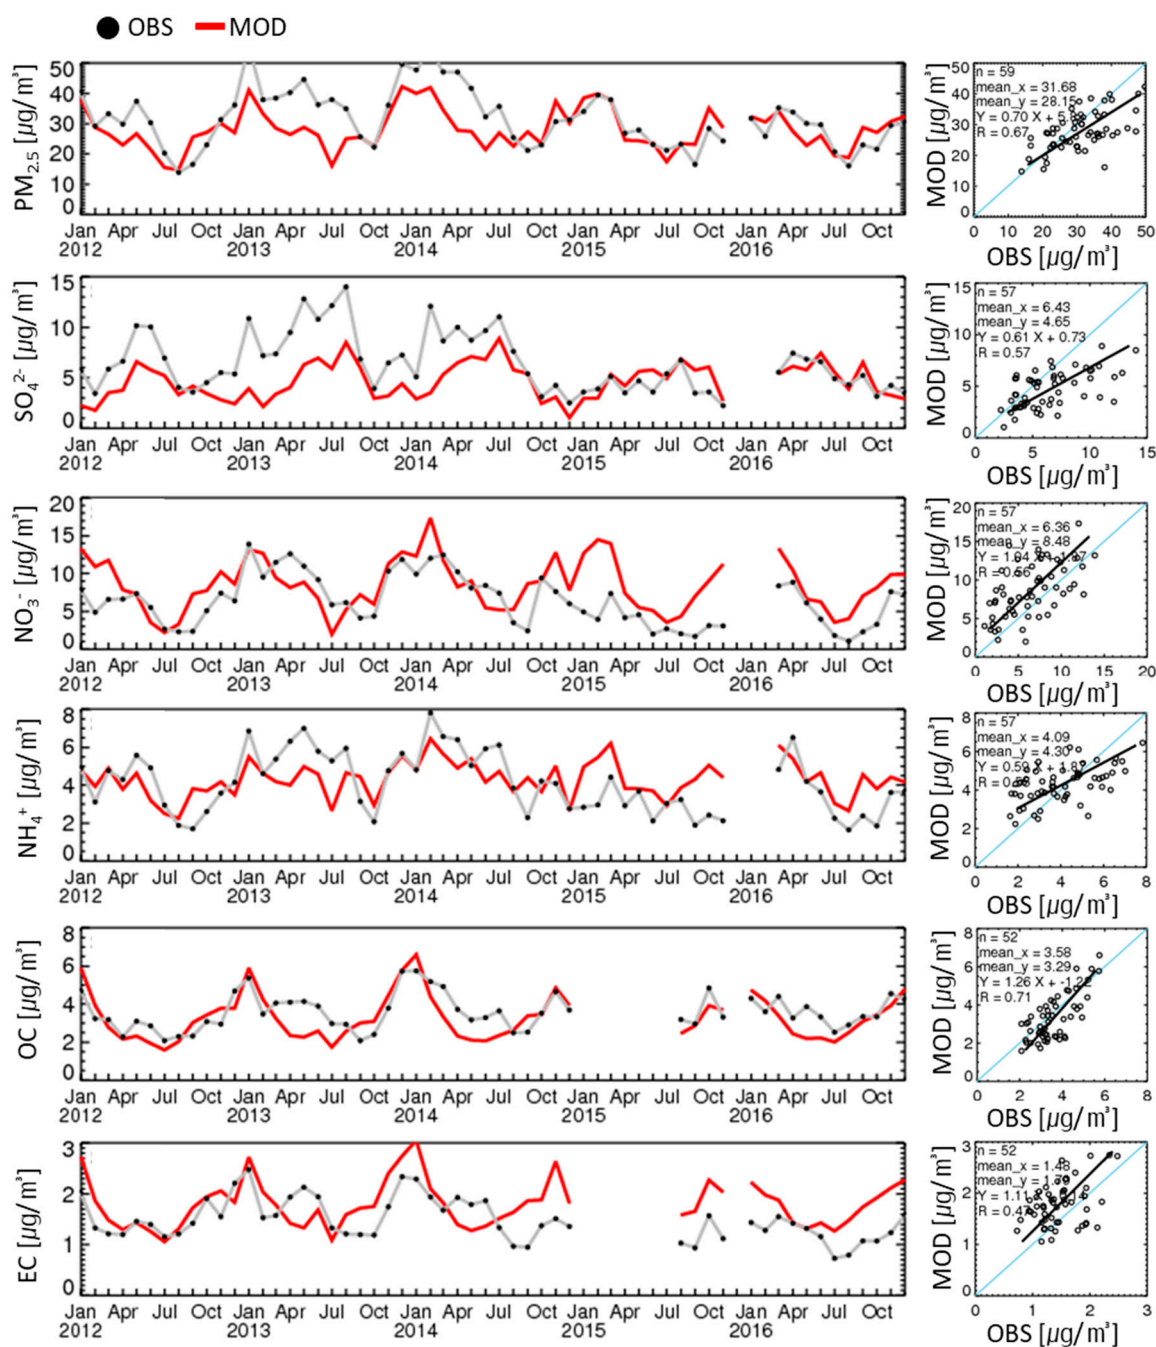

**Figure S2.** Time series (left) and scatter (right) of monthly mean  $PM_{2.5}$  and its components at the SMA super site from 2012 to 2016. Black circle and red line presents the observed and modeled concentrations, respectively.

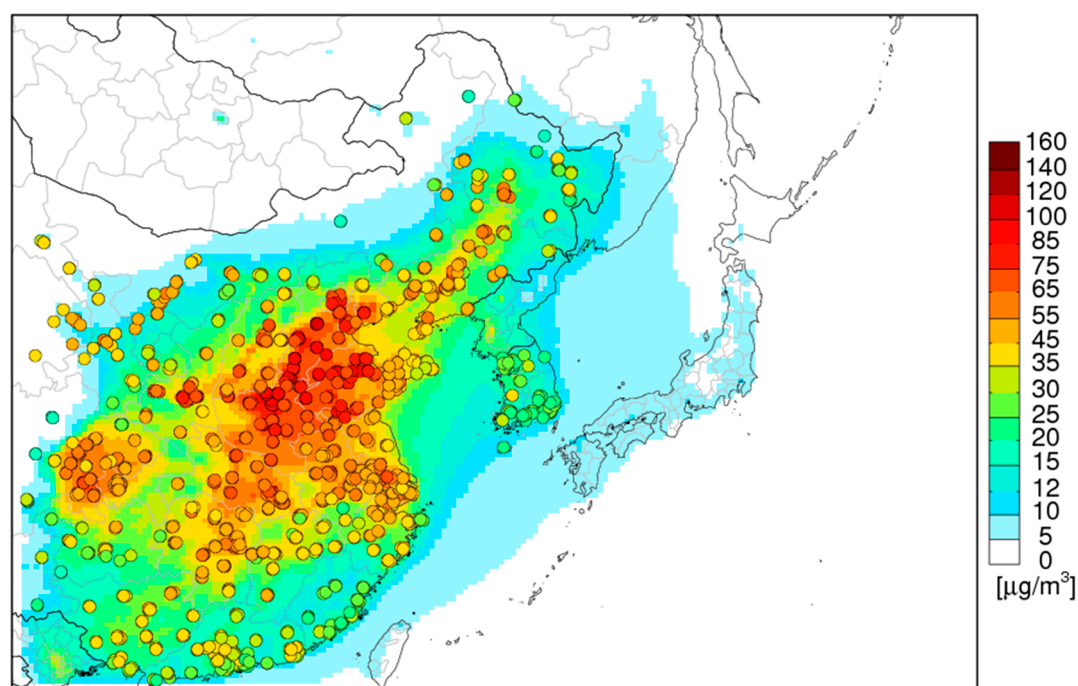

**Figure S3.** Spatial tile plot of simulated period mean  $PM_{2.5}$  concentrations overlaid by the observations at surface air quality monitoring sites in China during the period of 2015–2016. Circles represent the locations of air quality monitoring sites.

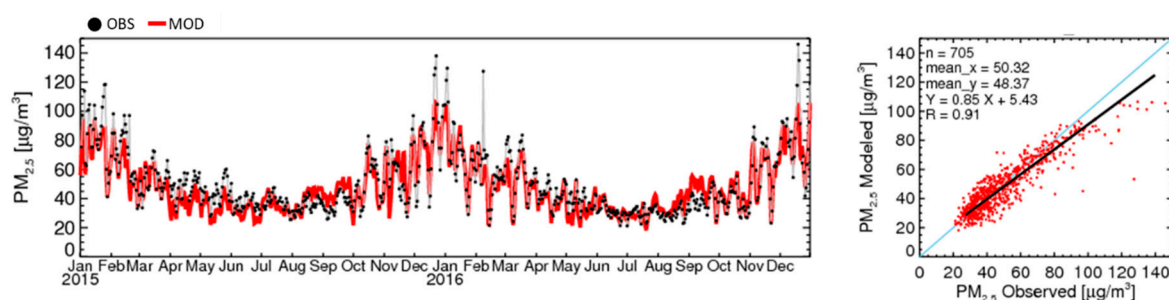

**Figure S4.** Time series (left) and scatter (right) of daily mean  $PM_{2.5}$  averaged over air quality monitoring sites in China for the period of 2015 to 2016. Black and red line presents the observed and modeled concentrations, respectively.

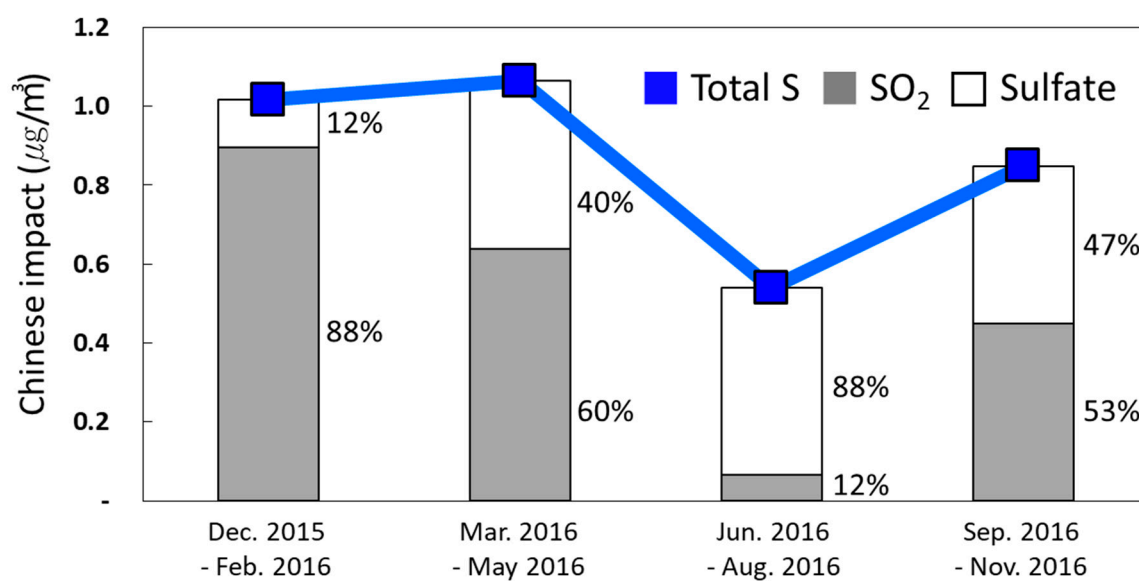

**Figure S5.** Seasonal Chinese impacts to Total S, SO<sub>2</sub>, and sulfate concentration estimated over the SMA for the period of 2015–2016. The percentages represent SO<sub>2</sub>/Total S ratio and sulfate/Total S ratio.
